# Supplementary material for: The confined [Bmim][BF4] ionic liquid flow through graphene oxide nanochannels: a molecular dynamics study
Source: Royal Society of Chemistry journal article supplement (doi:10.1039/c8cp02408a), 2018-01-01
Supplement: c8cp02408a1.pdf [file c8cp02408a1.pdf]

## Electronic Supplementary Information

### **The confined [Bmim][BF<sub>4</sub>] ionic liquid flow through graphene oxide nanochannel: A molecular dynamics study**

*Yanlei Wang, Feng Huo, Hongyan He<sup>\*</sup>, and Suojiang Zhang<sup>\*</sup>*

Beijing Key Laboratory of Ionic Liquids Clean Process, CAS Key Laboratory of Green Process and Engineering, State Key Laboratory of Multiphase Complex Systems, Institute of Process Engineering, Chinese Academy of Sciences, Beijing 100190, China

**\*Corresponding Author.**

Tel: +86-10-82544875 E-mail: hyhe@ipe.ac.cn

Tel: +86-10-82544875 E-mail: sjzhang@ipe.ac.cn

## Supplementary Figures and Captions:

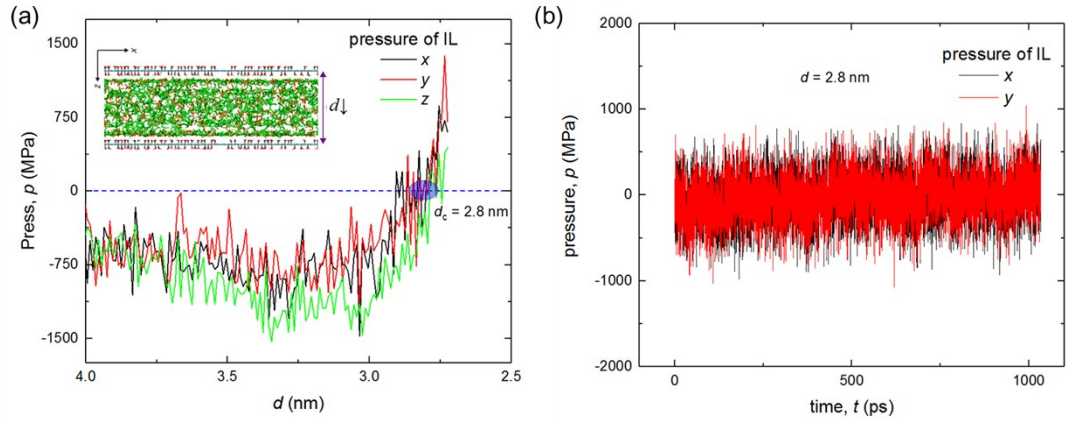

**Figure S1.** (a) The pressure-distance relations when decreasing the interlayer distance  $d$  in the MD simulations, showing a critical distance  $d_c = 2.8$  nm, and the pressure is calculated via

$$p_{xx} = \frac{1}{V} \sum_{i=1}^N [m_i v_x^2 + \frac{1}{2} \sum_{n=1}^{N_{\text{pair}}} \sum_{j=1,2} r_{i,jx} F_{i,jx} + \frac{1}{2} \sum_{n=1}^{N_b} \sum_{j=1,2} r_{i,jx} F_{i,jx} + \frac{1}{3} \sum_{n=1}^{N_{\text{ang}}} \sum_{j=1,2,3} r_{i,jx} F_{i,jx} + \frac{1}{4} \sum_{n=1}^{N_{\text{dih}}} \sum_{j=1,2,3,4} r_{i,jx} F_{i,jx} + \text{Kspace}(r_{i,x}, F_{i,x})]$$

where  $N$ ,  $N_{\text{pair}}$ ,  $N_b$ ,  $N_{\text{ang}}$  and  $N_{\text{dih}}$  are the number of atom, atom pairs, bonds, angles, dihedral angles in the system,  $r$  is the position of the specific atom, and  $F$  is the force on the specific atom resulting from the pairwise interaction. When  $d$  is larger than the critical distance, the pressure of the system will be a negative one. The negative pressure in the simulation originates from the mathematic calculations and is just a “nominal pressure” of the system. (b) The pressure of IL in the nanochannel with  $d = 2.8$  nm as a function of the simulation time, indicating a zero pressure along x and y directions.

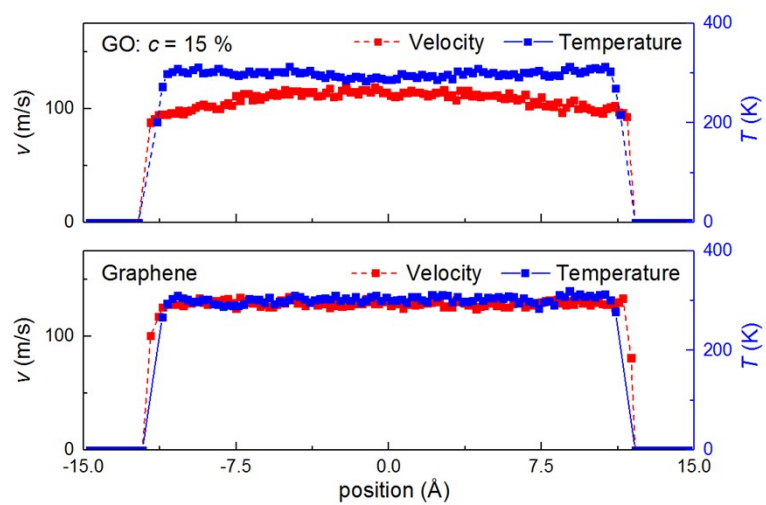

**Figure S2.** The distribution of temperature and velocity of the IL flow in nanochannel of graphene and GO with  $c = 15\%$ , where temperature is calculated through the kinetic energy that subtracting out the spatially-averaged center-of-mass velocity field.

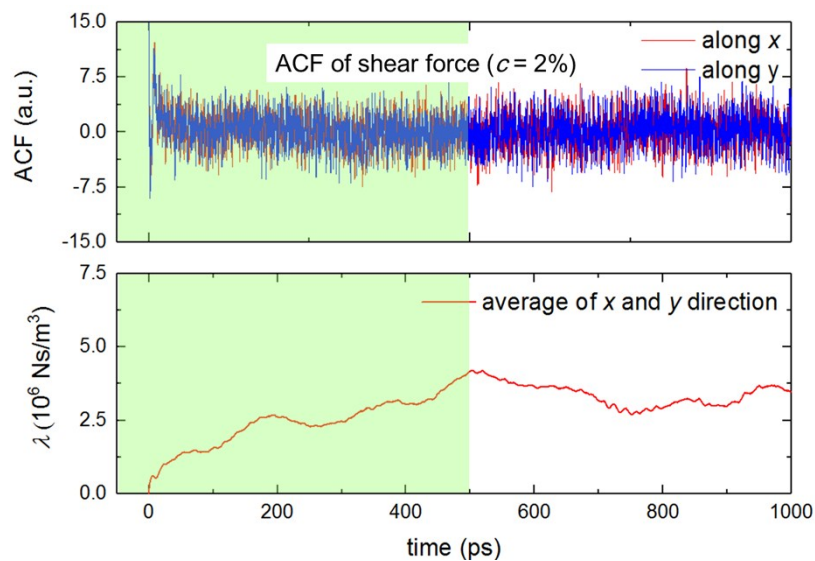

**Figure S3.** The autocorrelation function (ACF) of shear force and the integral friction coefficient of IL in GO with  $c = 2\%$ , indicating that the friction coefficient will up to convergence at  $\sim 500$  ps.

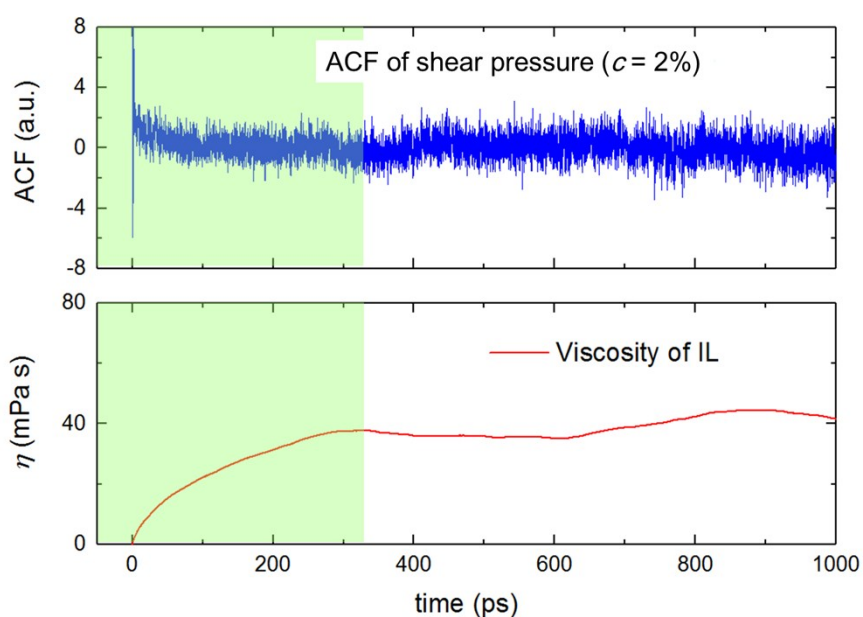

**Figure S4.** The autocorrelation function (ACF) of shear pressure and the integral viscosity of IL in GO with  $c = 2\%$ , indicating that the viscosity will up to convergence at  $\sim 300$  ps.

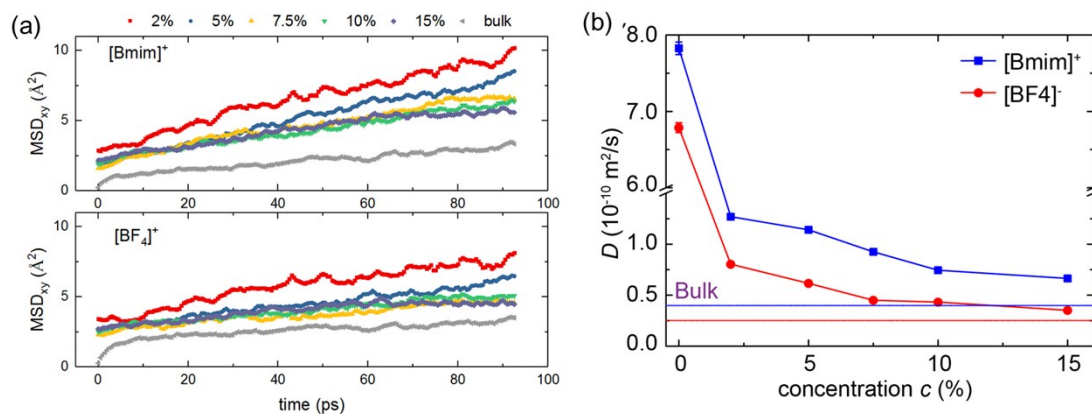

**Figure S5.** (a) Mean-square distance (MSD) of cation and anion in x and y plane, calculated in GO nanochannel with different concentration of hydroxyls. (b) Diffuse coefficient  $D_{xy}$  of cations and anions in the  $xy$  direction as a function of the concentration, where  $D$  is calculated via the equation,  $D = \lim_{t \rightarrow \max} \langle |\mathbf{r}(t) - \mathbf{r}(0)|^2 \rangle / 2d_i t$ . Here,  $d_i$  is the dimension of space,  $t$  is the simulation time, and  $\langle \dots \rangle$  is the ensemble average.

**Table S1** The partial charge of atoms in GO (*J. Am. Chem. Soc.* 1996, 118, 11225)

| Atom type                   | Charge ( <i>e</i> ) |
|-----------------------------|---------------------|
| H                           | 0.3294              |
| O                           | -0.5260             |
| C1 (connected to -OH)       | 0.1996              |
| C2(non-hydroxylated carbon) | 0.0000              |

**Table S2** The partial charge of atoms in IL (*J. Phys. Chem. B*, 2010, 114, 4572)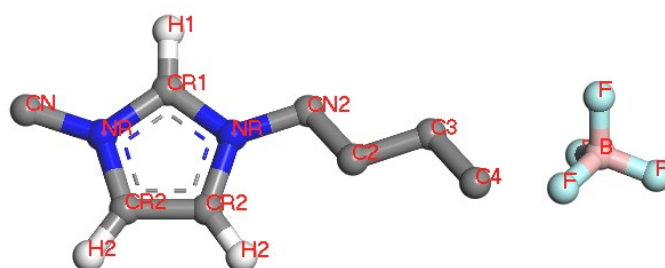

| Atom type (Bmim) | Charge ( <i>e</i> ) | Atom type (BF <sub>4</sub> ) | Charge ( <i>e</i> ) |
|------------------|---------------------|------------------------------|---------------------|
| NR               | 0.015               | B                            | 0.428               |
| CR1              | 0.000               | F                            | -0.307              |
| H1               | 0.150               |                              |                     |
| CR2              | -0.160              |                              |                     |
| H2               | 0.200               |                              |                     |
| CN               | 0.260               |                              |                     |
| CN2              | 0.230               |                              |                     |
| C2               | 0.050               |                              |                     |
| C3               | 0.000               |                              |                     |
| C4               | 0.000               |                              |                     |
